# Supplementary material for: Contribution of Mesenteric Lymph Nodes and GALT to the Intestinal Foxp3+ Regulatory T-Cell Compartment
Source: PubMed Central journal article supplement — Cell Mol Gastroenterol Hepatol. 2016 Jan 8;2(3):274–280.e3. doi: 10.1016/j.jcmgh.2015.12.009 (PMC4996285; doi:10.1016/j.jcmgh.2015.12.009), 2016-01-08
Supplement: NIHMS810778-supplement-01.pdf [file NIHMS810778-supplement-01.pdf]

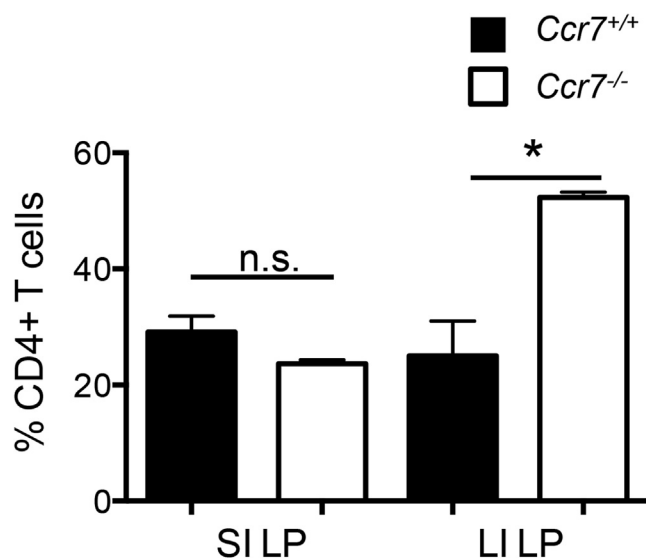

**Supplementary Figure 1. CD4<sup>+</sup> T cells accumulate in the intestinal LP independent of CCR7.** Comparison of TCR $\beta$ <sup>+</sup> CD4<sup>+</sup> cell frequencies in the SI and LI LP between *Ccr7*<sup>+/+</sup> and *Ccr7*<sup>-/-</sup> mice. Data are representative of 2 independent experiments with *n* = 4 mice per group. Error bars represent SEM. \**P* ≤ .05; NS, *P* > .05 using the Student *t* test.

**Supplementary Figure 2. Intestinal Foxp3<sup>+</sup> Treg development in splenectomized *Lta*<sup>-/-</sup> mice.** (A) Representative fluorescence-activated cell sorter plots of intestinal Foxp3<sup>+</sup> Tregs for *Lta*<sup>+/+</sup> and splenectomized (Splx) *Lta*<sup>-/-</sup> mice. Comparison of (B) total TCR $\beta$ <sup>+</sup> CD4<sup>+</sup> T-cell frequencies, (C) intestinal Foxp3<sup>+</sup> Treg frequencies, and (D) numbers for *Lta*<sup>+/+</sup> and Splx *Lta*<sup>-/-</sup> mice. Data are representative of 2 independent experiments with *n* = 4 mice per group. Error bars represent SEM. \**P* ≤ .05; n.s., *P* > .05 using the Student *t* test.

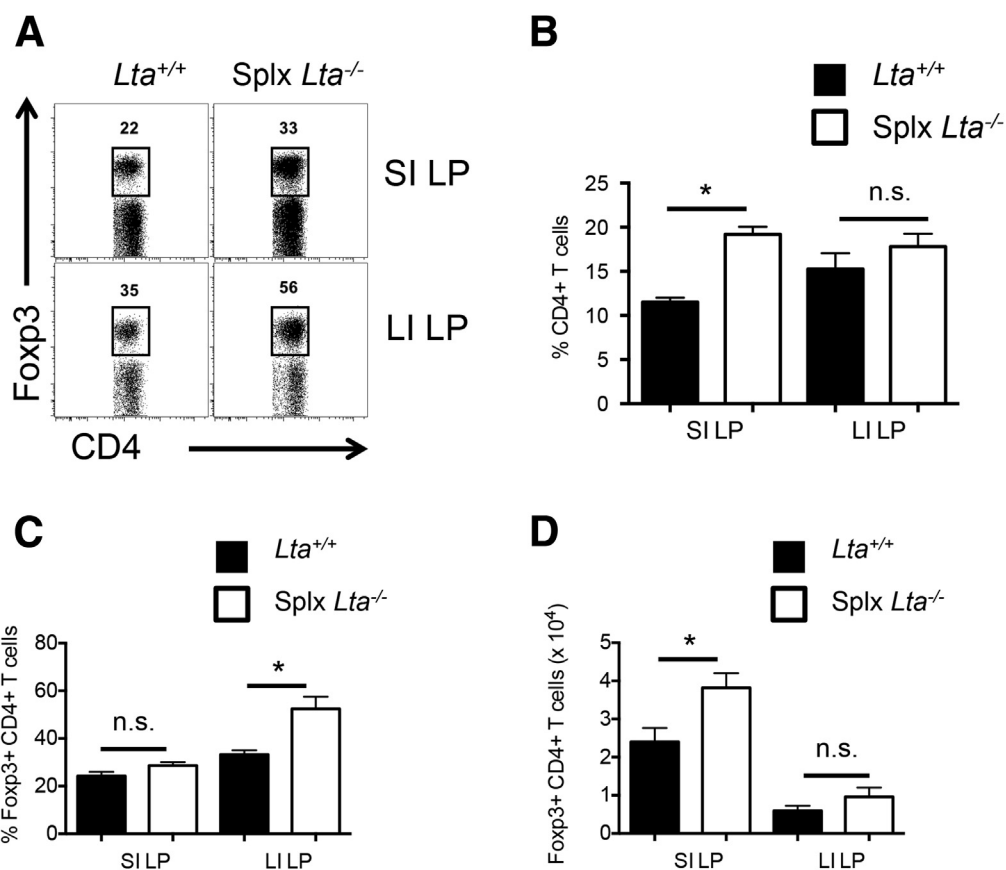

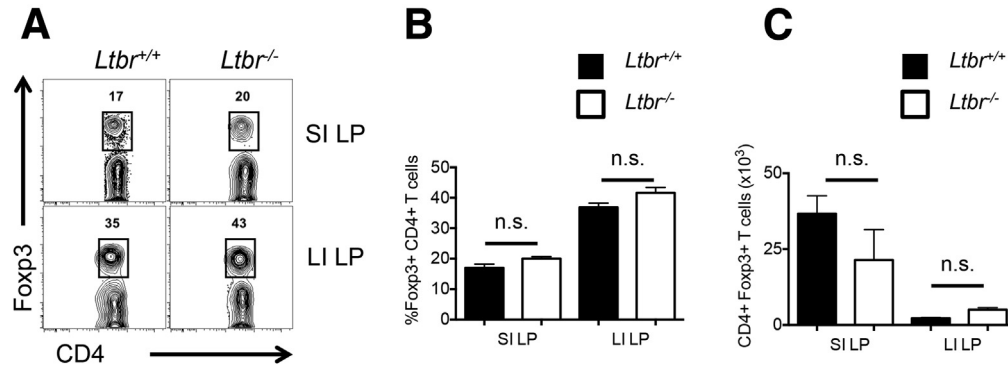

**Supplementary Figure 3. Intestinal Foxp3+ Treg development in *Ltbr*<sup>-/-</sup> mice.** (A) Representative fluorescence-activated cell sorter plots of intestinal Foxp3+ Tregs in *Ltbr*<sup>+/+</sup> and *Ltbr*<sup>-/-</sup> mice. Comparison of (B) intestinal Foxp3+ Treg frequencies and (C) numbers in *Ltbr*<sup>+/+</sup> and *Ltbr*<sup>-/-</sup> mice. Data are representative of 2 independent experiments with n = 4 mice per group. Error bars represent SEM. n.s.,  $P > .05$  using the Student *t* test.

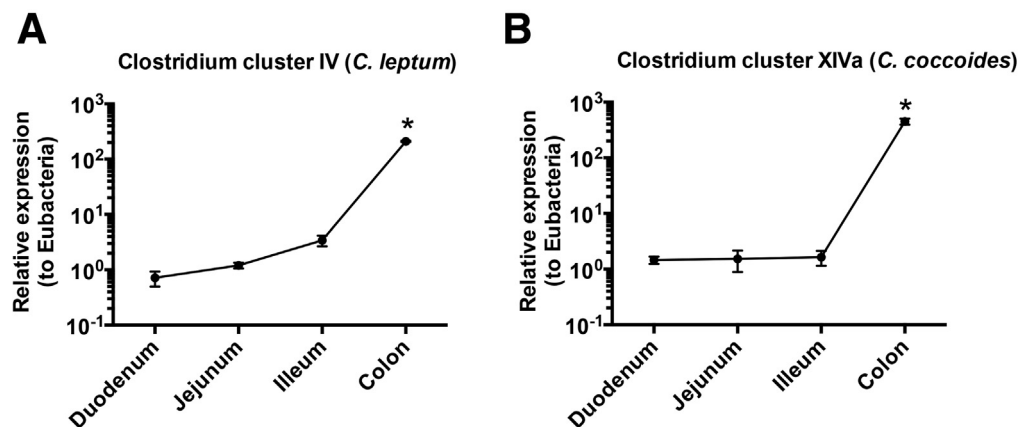

**Supplementary Figure 4. Analyses of *Clostridium* clusters IV and XIVa in the SI and LI.** DNA was isolated from the upper (duodenum), middle (jejunum), and lower (ileum) small intestine, and colon then was analyzed for 16S ribosomal DNA for *Clostridium* IV and XIVa groups. Quantitation of bacteria is shown relative to Eubacteria. Data are representative of 2 independent experiments with n = 4 mice per group. Error bars represent SEM. \* $P \leq .05$  using the Student *t* test.

**Supplementary****Figure 5. Treg-inducing cytokines are expressed preferentially in the LI.**

(A) IL2, (B) IL10, (C) IL35, and TGF- $\beta$ 1 mRNA expression in SI and LI. Data are representative of 2 independent experiments with  $n = 3$  mice per group. Error bars represent SEM. \* $P \leq .05$ ; n.s.,  $P > .05$  using the Student  $t$  test. GAPDH, glyceraldehyde-3-phosphate dehydrogenase.

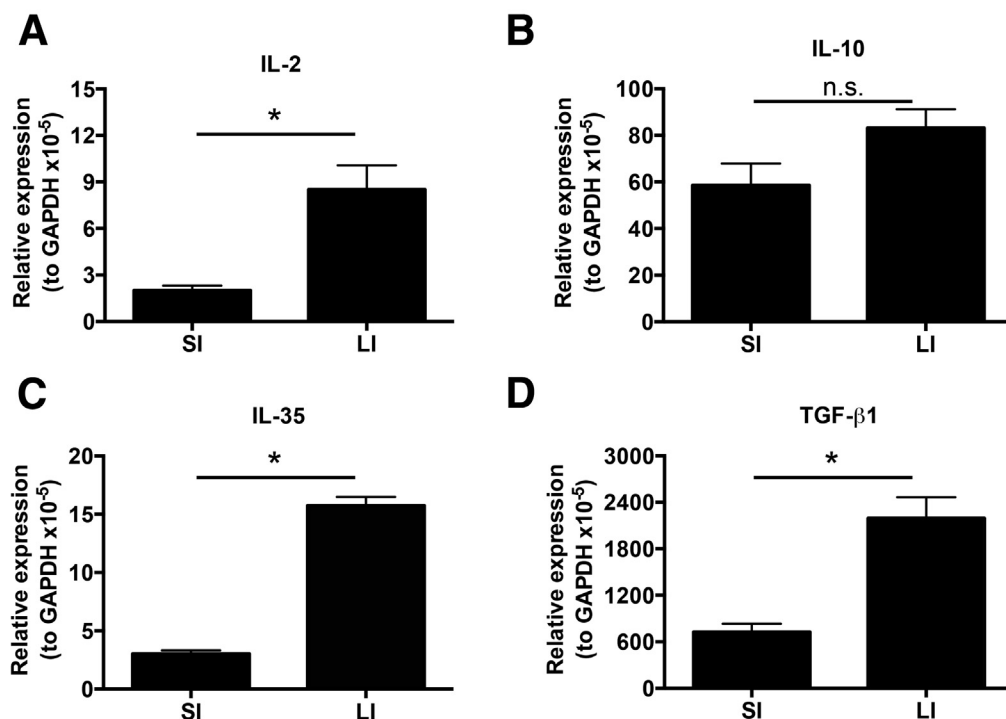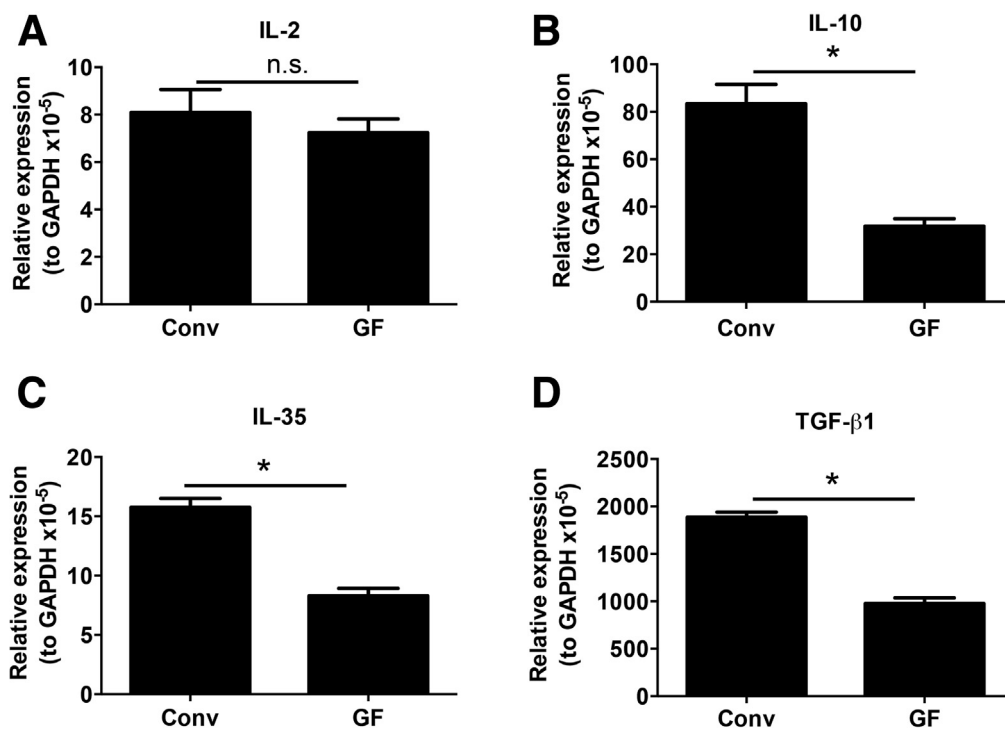**Supplementary**

**Figure 6. Influence of the microbiota on Treg-inducing cytokine expression in the LI.** (A) IL2, (B) IL10, (C) IL35, and TGF- $\beta$ 1 mRNA expression in the LI of WT C57BL/6 mice housed under conventional (Conv) or germ-free (GF) conditions. Data are representative of 2 independent experiments with  $n = 2$  mice per group. Error bars represent SEM. \* $P \leq .05$ ; n.s.,  $P > .05$  using the Student  $t$  test. GAPDH, glyceraldehyde-3-phosphate dehydrogenase.
